# Supplementary material for: Degradation of Tetracycline by Birnessite under Microwave Irradiation
Source: Hindawi journal article supplement (doi:10.1155/2014/409086), 2014-01-01
Supplement: f1 [file 409086.f1.pdf]

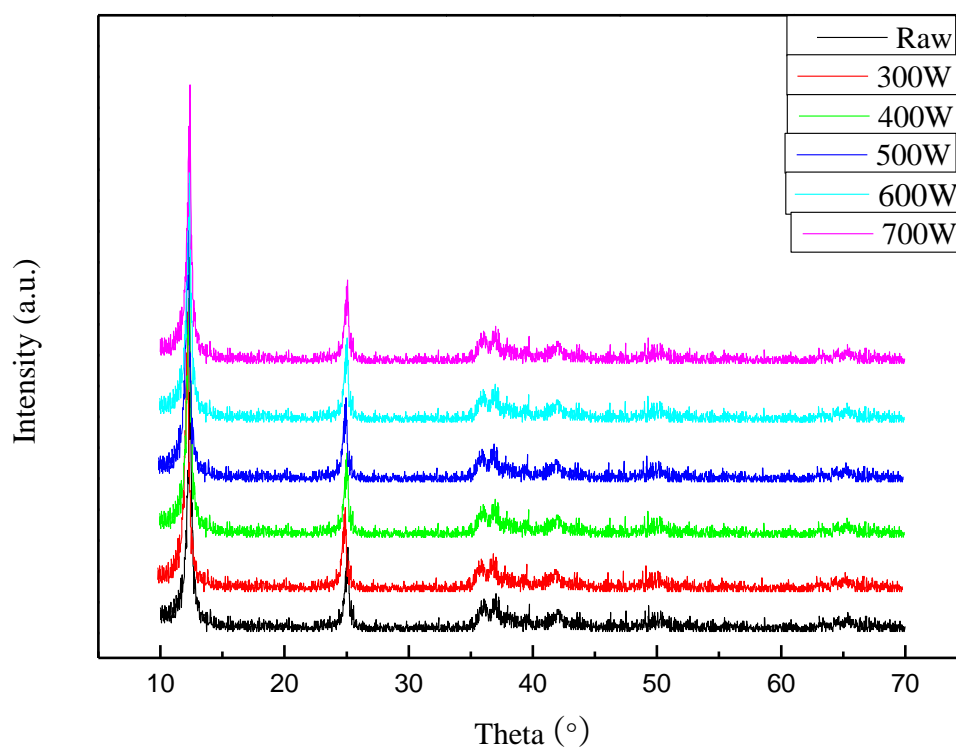

**Fig. S1. The role of different power after  
30 min of XRD birnessite**

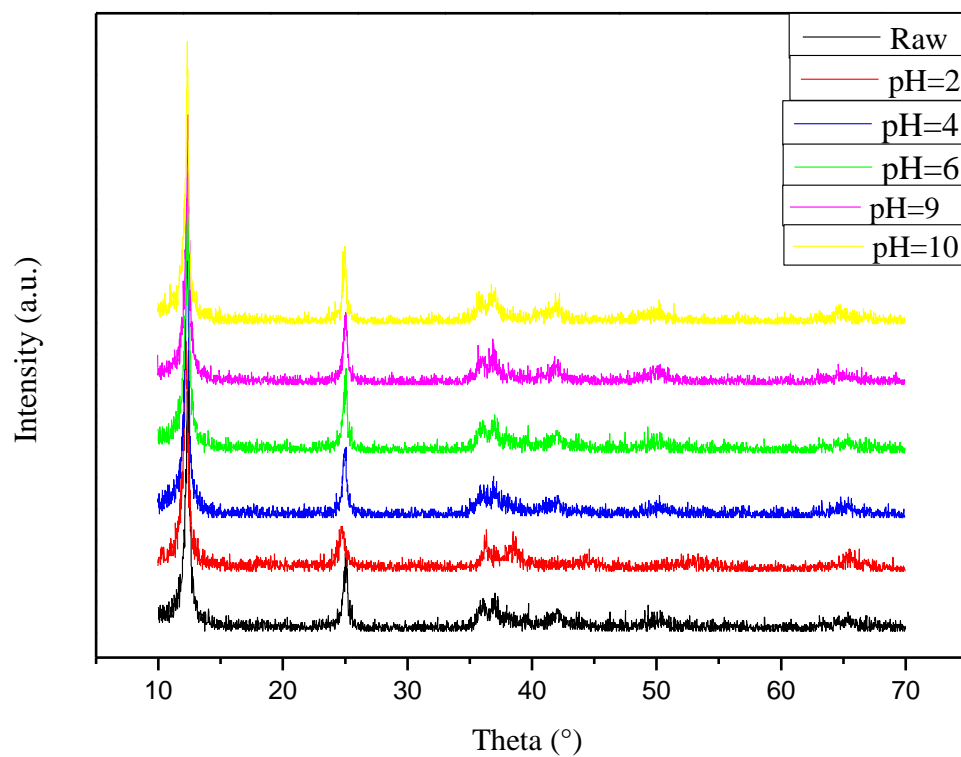

**Fig. 2S. The role of different pH conditions  
of Birnessite XRD**
